# Supplementary material for: A rapid capillary electrophoresis method with LED-induced native fluorescence detection for the analysis of cannabinoids in oral fluid
Source: Royal Society of Chemistry journal article supplement (doi:10.1039/c5ay01595b), 2015-01-01
Supplement: c5ay01595b1.pdf [file c5ay01595b1.pdf]

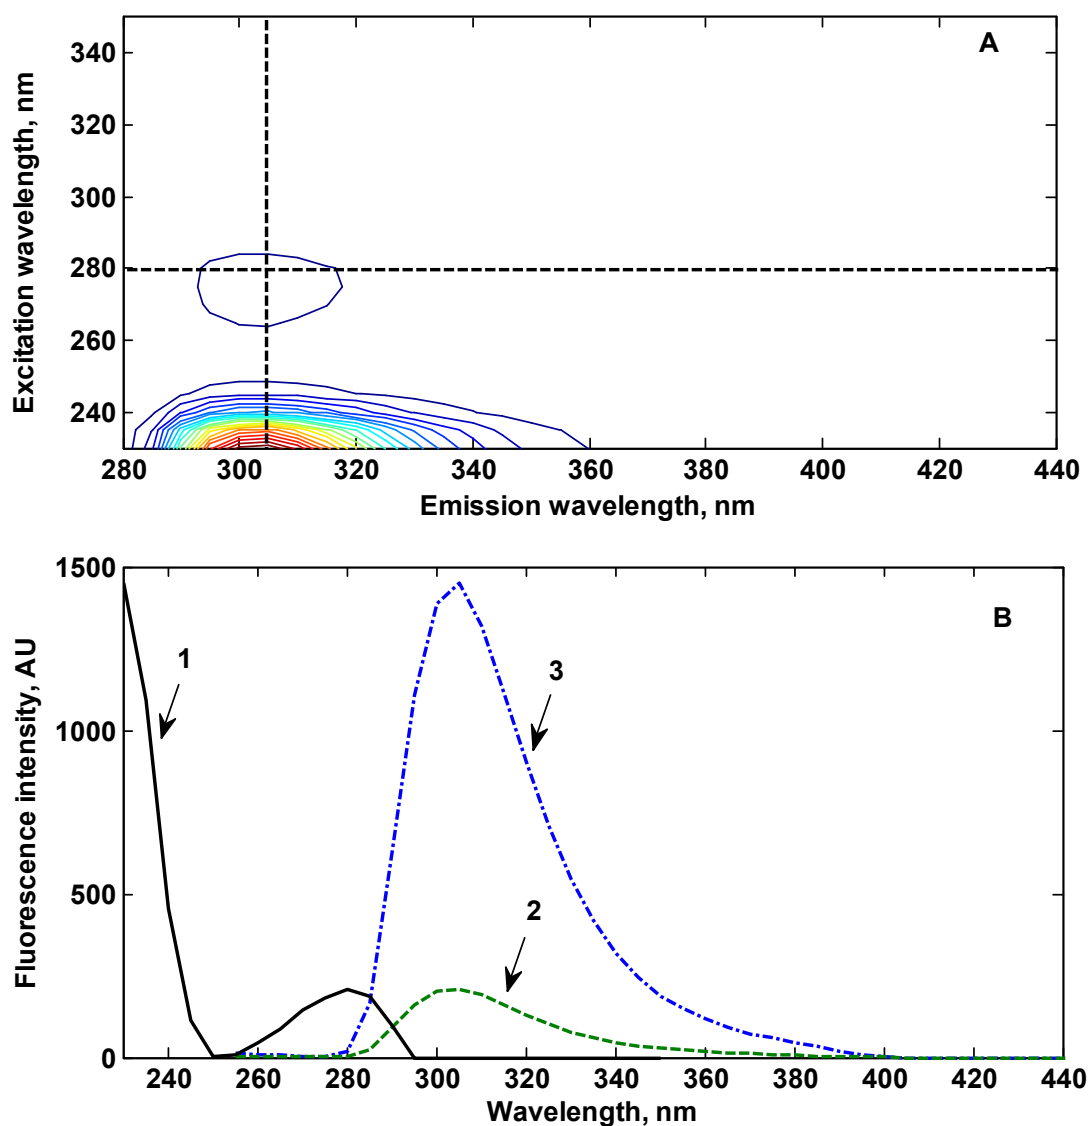

Figure 1S. THC and CBD fluorescence: A – excitation emission matrix of THC and CBD in ethanol with dashed lines showing the detection wavelengths of LED detector; B – THC spectra: 1 (solid line) – excitation spectrum registered at emission  $\lambda=305$  nm; 2 (dashed line) – emission spectrum excited at  $\lambda=280$  nm; 3 (dash-dotted line) – emission spectrum excited at  $\lambda=230$  nm.
